# Supplementary material for: A robust microporous 3D cobalt(ii) coordination polymer with new magnetically frustrated 2D lattices: single-crystal transformation and guest modulation of cooperative magnetic properties
Source: Royal Society of Chemistry journal article supplement (doi:10.1039/b603337g), 2006-01-01
Supplement: b603337g.pdf [file b603337g.pdf]

***ELECTRONIC SUPPLEMENTARY INFORMATION***

for

**A Robust Microporous 3D Cobalt(II) Coordination Polymer with New Magnetically Frustrated 2D Lattices: Single-Crystal Transformation and Modulation of Cooperative Magnetic Properties via Variety of Guest**

Ming-Hua Zeng, Xiao-Long Feng, Wei-Xiong Zhang, Xiao-Ming Chen\*

MOE Laboratory of Bioinorganic and Synthetic Chemistry, School of Chemistry and  
Chemical Engineering  
Sun Yat-Sen University  
Guangzhou 510275 (China)  
Fax: Int. code +86 20 8411-2245  
E-mail: cescxm@zsu.edu.cn

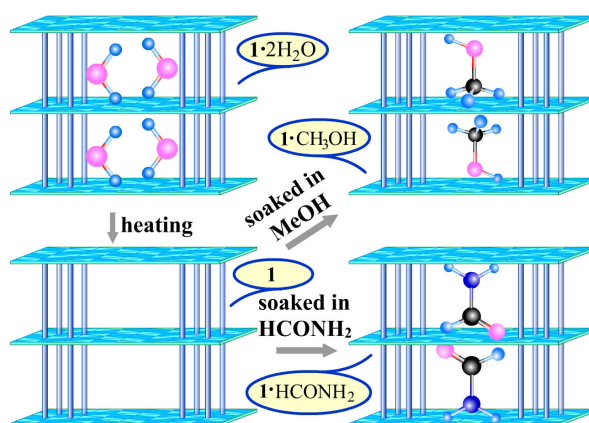

**Scheme S1.** Schematic representation of the guest removal/exchange.

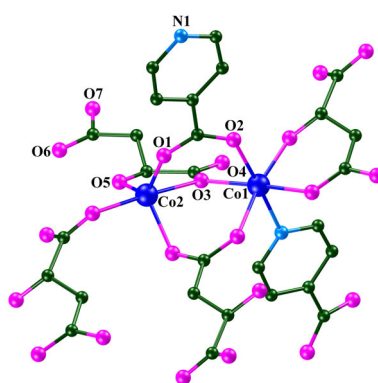

**Fig. S1** Perspective view of the coordination environments of  $\text{Co}^{\text{II}}$  ions in  $1 \cdot 2\text{H}_2\text{O}$ .

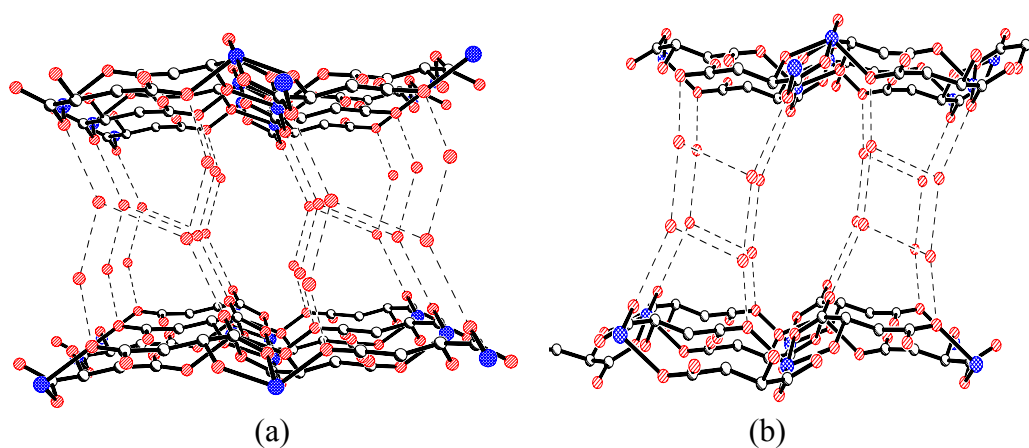

**Figure S2.** The H-bonding interactions in  $1 \cdot 2\text{H}_2\text{O}$  (a: 293 K, b: 93 K) viewed along the *b*-axis. The part of atoms omitted for clarity. The main carboxylate oxygen atoms involving with hydrogen bonds are coordinated to the trigonal-bipyramid  $\text{CoO}_5$  spin centers.

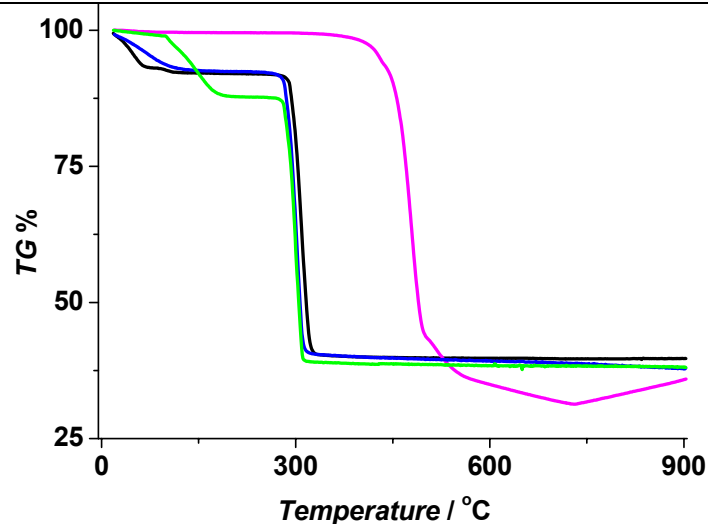

**Figure S3.** The TGA curves of  $1 \cdot 2\text{H}_2\text{O}$  (black),  $1 \cdot \text{MeOH}$  (blue),  $1 \cdot \text{HCONH}_2$  (green) under flowing air, and **1** (magenta) under flowing dinitrogen.  $1 \cdot 2\text{H}_2\text{O}$  shows the first weight loss of 8.2% at ca. 260 °C corresponding to the loss of the lattice water molecules (ca. 8.8% weight);  $1 \cdot \text{MeOH}$  shows the first weight loss of 7.7% at ca. 260 °C corresponding to the loss of the lattice MeOH molecules (ca. 8.0 % weight);  $1 \cdot \text{HCONH}_2$  shows the first weight loss of 11.7% at ca. 260 °C corresponding to the loss of the lattice HCONH<sub>2</sub> molecules (ca. 10.8% weight); the TGA curve in flowing N<sub>2</sub> for **1** shows no weight loss up to ~340 °C.

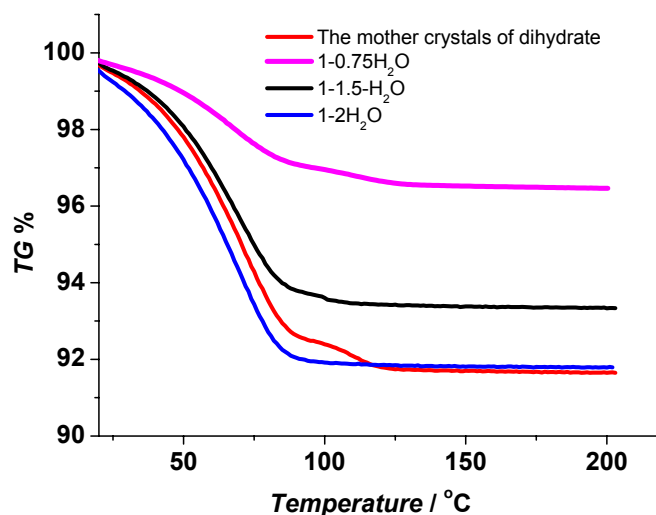

**Figure S4.** The TGA curves (20~200 °C) of the rehydration of **1** in air (at  $T = 22(2) \text{ } ^\circ\text{C}$ , relative humidity = 35(5)%) for one day (magenta), three days (black), and six days (blue).

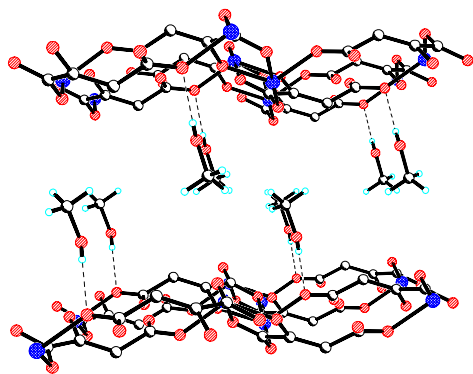

**Figure S5.** The H-bonding interactions in **1**·MeOH viewed along the *b*-axis. Part of atoms are omitted for clarity.

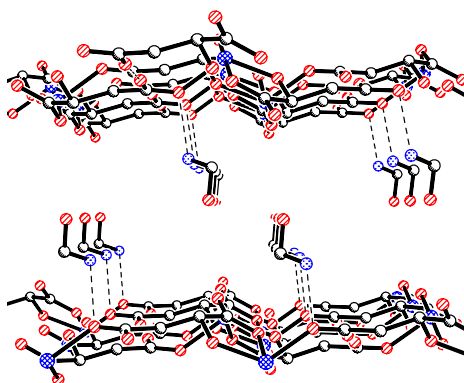

**Figure S6.** The H-bonding interactions in **1**·HCONH<sub>2</sub> viewed along the *b*-axis.

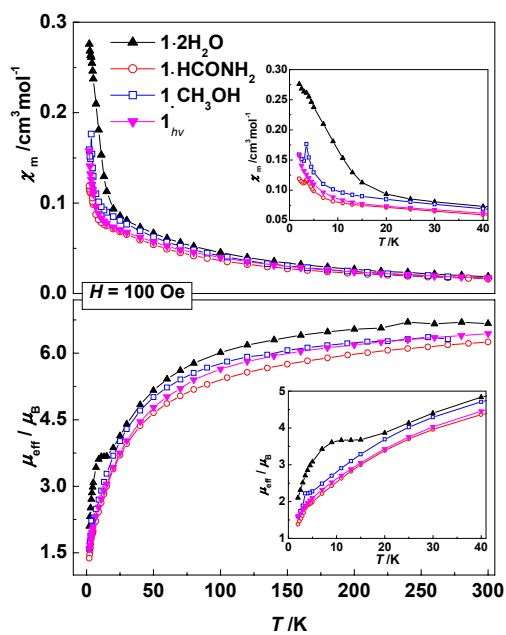

**Fig. S7** Magnetic curves for  $1 \cdot 2\text{H}_2\text{O}$ ,  $1 \cdot \text{HCONH}_2$ ,  $1 \cdot \text{MeOH}$ , and  $1$  ( $\chi_M$ : upper,  $\mu_{\text{eff}}$ : lower, per  $\text{Co}^{\text{II}}_2$  under  $H = 100$  Oe). Inset: the amplification curves below 40 K.

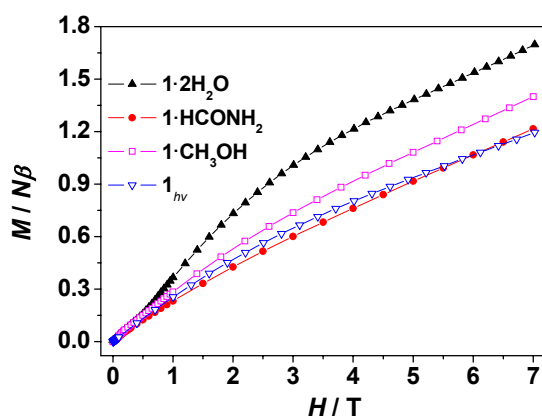

**Figure S8.** First magnetization at 2 K for  $1 \cdot 2\text{H}_2\text{O}$ ,  $1 \cdot \text{HCONH}_2$ ,  $1 \cdot \text{MeOH}$ , and  $1$ .

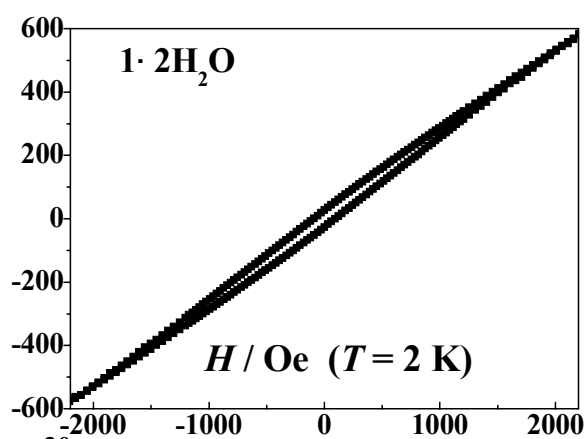

**Figure S9.** Hysteresis loops at 2 K for  $1 \cdot 2\text{H}_2\text{O}$ .

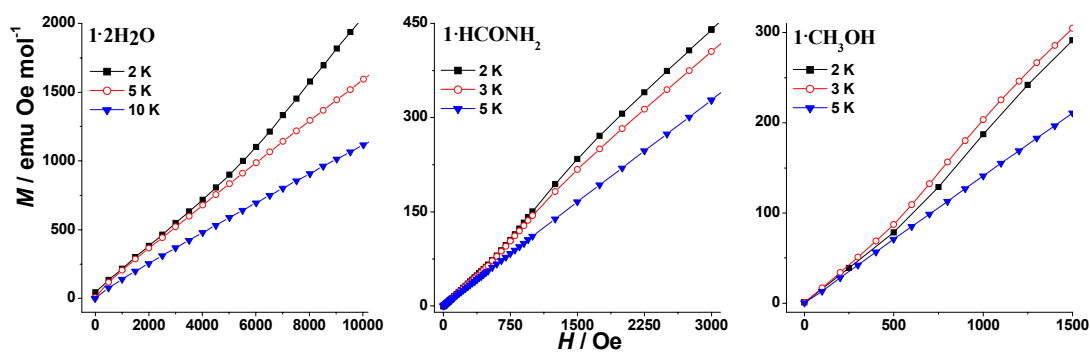

**Figure S10.** Magnification of the first magnetization at 2~10 K for  $1 \cdot 2\text{H}_2\text{O}$ ,  $1 \cdot \text{MeOH}$  and  $1 \cdot \text{HCONH}_2$  at low field.

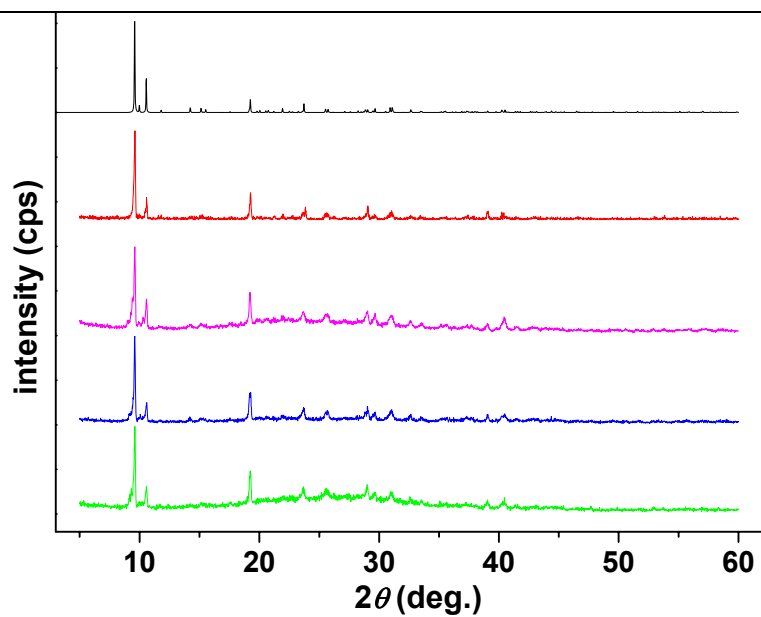

**Figure S11.** The simulated (black) and experimental powder X-ray diffraction patterns of  $1 \cdot 2\text{H}_2\text{O}$  (red), **1** (magenta),  $1 \cdot \text{MeOH}$  (blue) and  $1 \cdot \text{HCONH}_2$  (green).

Table S1. Crystallographic data and structure refinements of  $1 \cdot 2\text{H}_2\text{O}'$ .

| Compound                                              | $1 \cdot 2\text{H}_2\text{O}'$                     |
|-------------------------------------------------------|----------------------------------------------------|
| $T / K$                                               | 293                                                |
| Formula                                               | $\text{C}_{10}\text{H}_{11}\text{Co}_2\text{NO}_9$ |
| FW                                                    | 407.07                                             |
| $a / \text{Å}$                                        | 23.62(2)                                           |
| $b / \text{Å}$                                        | 10.096(6)                                          |
| $c / \text{Å}$                                        | 14.99(1)                                           |
| $\beta / \text{deg}$                                  | 128.71(2)                                          |
| $V / \text{Å}^3$                                      | 2790(3)                                            |
| $D_c / \text{g} \cdot \text{cm}^{-3}$                 | 1.938                                              |
| $\mu / \text{mm}^{-1}$                                | 2.424                                              |
| $R_{\text{int}}$                                      | 0.055                                              |
| $R_1 (I > 2\theta)$                                   | 0.0634                                             |
| $wR_2$ (all data)                                     | 0.1909                                             |
| GOF                                                   | 1.23                                               |
| $\Delta\rho_{\text{min/max}} (\text{e} / \text{Å}^3)$ | -1.04~2.32                                         |
| Free volume                                           | 26.2%                                              |





**Table S2.** Summary of the cell-parameter deviations of the crystal structures

|                           | <b>1</b> ·2H <sub>2</sub> O (293 K)<br>→ <b>1</b> (293 K) | <b>1</b> ·2H <sub>2</sub> O (293 K)<br>→ <b>1</b> ·2H <sub>2</sub> O (93 K) | <b>1</b> ·2H <sub>2</sub> O (293 K)<br>→ <b>1</b> ·MeOH (293<br>K) | <b>1</b> ·2H <sub>2</sub> O (93 K) →<br><b>1</b> ·MeOH (93 K) | <b>1</b> ·2H <sub>2</sub> O (293 K)<br>→ <b>1</b> ·HCONH <sub>2</sub><br>(293 K) | <b>1</b> ·2H <sub>2</sub> O (93 K)<br>→ <b>1</b> ·HCONH <sub>2</sub><br>(93 K) | Max deviation<br>(293 K) | Max deviation<br>(93 K) |
|---------------------------|-----------------------------------------------------------|-----------------------------------------------------------------------------|--------------------------------------------------------------------|---------------------------------------------------------------|----------------------------------------------------------------------------------|--------------------------------------------------------------------------------|--------------------------|-------------------------|
| <i>a</i> / Å              | -0.29%                                                    | -0.095%                                                                     | -0.39%                                                             | +1.3%                                                         | +0.14%                                                                           | +2.0%                                                                          | 0.57%                    | 2.0%                    |
| <i>b</i> / Å              | -0.23%                                                    | +0.25%                                                                      | +0.11%                                                             | -0.78%                                                        | +0.21%                                                                           | -0.45%                                                                         | 0.44%                    | 0.45%                   |
| <i>c</i> / Å              | -0.19%                                                    | -0.59%                                                                      | +0.44%                                                             | 0.64%                                                         | +0.55%                                                                           | +0.87%                                                                         | 0.74%                    | 0.87%                   |
| <i>β</i> /<br>deg         | -0.10%                                                    | -0.51%                                                                      | -0.17%                                                             | 0.63%                                                         | +0.054%                                                                          | +0.99%                                                                         | 0.36%                    | 1.0%                    |
| <i>V</i> / Å <sup>3</sup> | -0.52%                                                    | -0.46%                                                                      | +0.46%                                                             | 0.0036%                                                       | +0.80%                                                                           | 0.70%                                                                          | 1.3%                     | 0.70%                   |

**Table S3.** Selected bond lengths (Å) for the compounds

|                     | <b>1</b> ·2H <sub>2</sub> O (293 K) | <b>1</b> ·2H <sub>2</sub> O (93 K) | <b>1</b> ·2H <sub>2</sub> O' (293 K) | <b>1</b> ·MeOH (293 K) | <b>1</b> ·MeOH (93 K) | <b>1</b> ·HCONH <sub>2</sub> (293 K) | <b>1</b> ·HCONH <sub>2</sub> (93 K) | <b>1</b> (293 K) | Max<br>deviation<br>for 93 K | Max<br>deviation<br>for all |
|---------------------|-------------------------------------|------------------------------------|--------------------------------------|------------------------|-----------------------|--------------------------------------|-------------------------------------|------------------|------------------------------|-----------------------------|
| Co1-O1              | 2.089(4)                            | 2.082(4)                           | 2.100(6)                             | 2.089(5)               | 2.079(4)              | 2.097(5)                             | 2.083(4)                            | 2.100(6)         | 0.19%                        | 0.91%                       |
| Co1-O3              | 2.082(3)                            | 2.082(4)                           | 2.082(5)                             | 2.084(4)               | 2.080(4)              | 2.085(5)                             | 2.081(4)                            | 2.082(5)         | 0.19%                        | 0.58%                       |
| Co1-O5 <sup>a</sup> | 2.013(3)                            | 2.010(3)                           | 2.008(4)                             | 2.017(4)               | 2.012(3)              | 2.022(4)                             | 2.020(3)                            | 2.008(4)         | 0.50%                        | 0.70%                       |
| Co1-O6 <sup>a</sup> | 2.124(3)                            | 2.113(3)                           | 2.121(5)                             | 2.128(5)               | 2.117(4)              | 2.120(5)                             | 2.123(4)                            | 2.121(5)         | 0.47%                        | 0.76%                       |
| Co1-O6 <sup>c</sup> | 2.149(3)                            | 2.146(3)                           | 2.160(5)                             | 2.156(4)               | 2.148(4)              | 2.163(4)                             | 2.152(4)                            | 2.160(5)         | 0.23%                        | 0.89%                       |
| Co1-N1 <sup>b</sup> | 2.161(5)                            | 2.150(5)                           | 2.163(7)                             | 2.149(6)               | 2.146(5)              | 2.165(6)                             | 2.147(5)                            | 2.163(7)         | 0.19%                        | 0.84%                       |
| Co2-O2              | 1.968(5)                            | 1.972(4)                           | 1.959(6)                             | 1.970(6)               | 1.977(5)              | 1.972(6)                             | 1.974(5)                            | 1.959(6)         | 0.25%                        | 0.87%                       |
| Co2-O3              | 2.114(3)                            | 2.107(3)                           | 2.118(5)                             | 2.111(4)               | 2.114(3)              | 2.116(4)                             | 2.109(3)                            | 2.118(5)         | 0.33%                        | 0.47%                       |
| Co2-O4 <sup>d</sup> | 2.077(3)                            | 2.078(3)                           | 2.081(5)                             | 2.079(4)               | 2.079(4)              | 2.078(5)                             | 2.071(3)                            | 2.081(5)         | 0.43%                        | 0.53%                       |
| Co2-O5              | 1.939(4)                            | 1.936(3)                           | 1.945(5)                             | 1.939(5)               | 1.942(5)              | 1.944(5)                             | 1.941(5)                            | 1.945(5)         | 0.26%                        | 0.47%                       |
| Co2-O7 <sup>c</sup> | 2.007(4)                            | 2.006(5)                           | 2.009(5)                             | 2.000(4)               | 1.996(4)              | 2.000(5)                             | 2.004(4)                            | 2.009(5)         | 0.45%                        | 0.65%                       |

Symmetry codes: a) 0.5-x, y-0.5, 0.5-z; b) x, 2-y, z-0.5; c) x-0.5, 1.5-y, z-0.5; d) 0.5-x, 0.5+y, 0.5-z; e) x, 2-y, z+0.5.

**Table S4.** Selected bond angles (°) for the compounds

|                                      | <b>1</b> ·2H <sub>2</sub> O<br>(293 K) | <b>1</b> ·2H <sub>2</sub> O<br>(93 K) | <b>1</b> ·2H <sub>2</sub> O'<br>(293 K) | <b>1</b> ·MeOH<br>(293 K) | <b>1</b> ·MeOH<br>(93 K) | <b>1</b> ·HCONH <sub>2</sub><br>(293K) | <b>1</b> ·HCONH <sub>2</sub><br>(93 K) | <b>1</b><br>(293 K) | Max<br>deviation<br>at 93 K | Max<br>deviation<br>of all |
|--------------------------------------|----------------------------------------|---------------------------------------|-----------------------------------------|---------------------------|--------------------------|----------------------------------------|----------------------------------------|---------------------|-----------------------------|----------------------------|
| O1-Co1-O5 <sup>a</sup>               | 90.4(2)                                | 90.7(2)                               | 90.6(2)                                 | 90.7(2)                   | 90.5(2)                  | 90.6(2)                                | 90.7(2)                                | 90.6(2)             | 0.11%                       | 0.33%                      |
| O3-Co1-O5 <sup>a</sup>               | 96.7(1)                                | 97.0(1)                               | 96.8(2)                                 | 97.0(2)                   | 96.5(2)                  | 96.7(2)                                | 95.8(2)                                | 96.8(2)             | 1.25%                       | 1.25%                      |
| O1-Co1-O3                            | 88.0(1)                                | 87.5(2)                               | 87.5(2)                                 | 88.0(2)                   | 88.8(2)                  | 88.3(2)                                | 88.2(2)                                | 87.5(2)             | 1.49%                       | 1.49%                      |
| O5 <sup>a</sup> -Co1-O6 <sup>a</sup> | 89.8(2)                                | 89.7(1)                               | 89.8(2)                                 | 90.0(2)                   | 89.6(2)                  | 89.9(2)                                | 90.3(2)                                | 89.8(2)             | 0.78%                       | 0.78%                      |
| O1-Co1-O6 <sup>a</sup>               | 87.8(1)                                | 87.1(1)                               | 88.1(2)                                 | 88.1(2)                   | 87.9(2)                  | 87.7(2)                                | 87.3(2)                                | 88.1(2)             | 0.80%                       | 1.15%                      |
| O3-Co1-O6 <sup>a</sup>               | 172.3(1)                               | 171.5(1)                              | 172.1(2)                                | 172.1(2)                  | 173.1(2)                 | 172.3(2)                               | 172.5(2)                               | 172.1(2)            | 0.93%                       | 0.93%                      |
| O5 <sup>a</sup> -Co1-N1 <sup>b</sup> | 90.5(2)                                | 89.5(2)                               | 90.5(2)                                 | 90.3(2)                   | 90.3(2)                  | 90.3(2)                                | 90.4(2)                                | 90.5(2)             | 1.01%                       | 1.01%                      |
| O1-Co1-N1 <sup>b</sup>               | 177.6(2)                               | 177.2(2)                              | 177.3(2)                                | 178.0(2)                  | 178.5(2)                 | 178.1(2)                               | 178.3(2)                               | 177.3(2)            | 0.73%                       | 0.73%                      |
| O3-Co1-N1 <sup>b</sup>               | 89.7(2)                                | 89.7(2)                               | 89.9(2)                                 | 90.1(2)                   | 89.8(2)                  | 89.9(2)                                | 90.4(2)                                | 89.9(2)             | 0.78%                       | 0.78%                      |
| O6 <sup>a</sup> -Co1-N1 <sup>b</sup> | 94.5(1)                                | 95.7(2)                               | 94.4(2)                                 | 93.7(2)                   | 93.5(2)                  | 94.0(2)                                | 93.9(2)                                | 94.4(2)             | 2.35%                       | 2.35%                      |
| O5 <sup>a</sup> -Co1-O6 <sup>c</sup> | 168.2(2)                               | 168.1(1)                              | 167.9(2)                                | 168.4(2)                  | 168.9(2)                 | 168.1(2)                               | 169.2(2)                               | 167.9(2)            | 0.65%                       | 0.65%                      |
| O1-Co1-O6 <sup>c</sup>               | 89.9(1)                                | 88.9(1)                               | 89.3(2)                                 | 89.9(2)                   | 90.1(2)                  | 89.6(2)                                | 89.5(2)                                | 89.3(2)             | 1.24%                       | 1.24%                      |
| O3-Co1-O6 <sup>c</sup>               | 95.2(1)                                | 94.9(1)                               | 95.3(2)                                 | 94.6(1)                   | 94.6(1)                  | 95.2(2)                                | 95.0(1)                                | 95.3(2)             | 0.42%                       | 0.74%                      |
| O6 <sup>a</sup> -Co1-O6 <sup>c</sup> | 78.4(1)                                | 78.5(1)                               | 78.1(2)                                 | 78.5(1)                   | 79.4(1)                  | 78.2(2)                                | 78.9(1)                                | 78.1(2)             | 1.40%                       | 1.79%                      |
| O6 <sup>c</sup> -Co1-N1 <sup>b</sup> | 89.8(1)                                | 91.6(2)                               | 90.1(2)                                 | 89.5(2)                   | 89.5(2)                  | 89.9(2)                                | 89.6(2)                                | 90.1(2)             | 2.35%                       | 2.35%                      |
| O2-Co2-O5                            | 128.9(2)                               | 130.0(2)                              | 129.4(2)                                | 126.5(2)                  | 127.5(2)                 | 127.4(2)                               | 130.1(2)                               | 129.4(2)            | 2.04%                       | 2.85%                      |
| O5-Co2-O7 <sup>c</sup>               | 122.1(2)                               | 121.4(2)                              | 122.2(3)                                | 124.6(2)                  | 123.3(2)                 | 124.6(3)                               | 122.0(2)                               | 122.2(3)            | 1.73%                       | 2.64%                      |
| O2-Co2-O7 <sup>c</sup>               | 107.9(2)                               | 107.7(2)                              | 107.3(3)                                | 107.9(2)                  | 108.2(2)                 | 107.0(3)                               | 107.0(2)                               | 107.3(3)            | 0.93%                       | 1.31%                      |
| O4 <sup>d</sup> -Co2-O5              | 99.2(2)                                | 98.8(2)                               | 99.0(2)                                 | 98.6(2)                   | 99.1(2)                  | 98.6(2)                                | 99.0(2)                                | 99.0(2)             | 0.30%                       | 0.71%                      |
| O2-Co2-O4 <sup>d</sup>               | 90.9(2)                                | 90.4(1)                               | 90.8(2)                                 | 91.0(2)                   | 90.0(2)                  | 91.3(2)                                | 90.2(2)                                | 90.8(2)             | 0.44%                       | 1.44%                      |
| O4 <sup>d</sup> -Co2-O7 <sup>c</sup> | 89.1(1)                                | 88.8(2)                               | 88.9(2)                                 | 89.7(2)                   | 89.6(2)                  | 89.0(2)                                | 89.7(2)                                | 88.9(2)             | 0.90%                       | 1.13%                      |
| O3-Co2-O5                            | 79.6(1)                                | 80.1(1)                               | 79.8(2)                                 | 80.1(2)                   | 79.7(2)                  | 79.8(2)                                | 79.5(2)                                | 79.8(2)             | 0.75%                       | 0.75%                      |
| O2-Co2-O3                            | 92.8(2)                                | 93.0(1)                               | 93.0(2)                                 | 92.0(2)                   | 92.4(2)                  | 92.5(2)                                | 92.6(2)                                | 93.0(2)             | 0.65%                       | 0.87%                      |
| O3-Co2-O7 <sup>c</sup>               | 88.4(1)                                | 88.9(2)                               | 88.5(2)                                 | 88.7(2)                   | 89.2(2)                  | 88.9(2)                                | 89.1(2)                                | 88.5(2)             | 0.79%                       | 1.7%                       |
| O3-Co2-O4 <sup>d</sup>               | 176.1(2)                               | 176.4(2)                              | 175.8(2)                                | 176.9(2)                  | 177.5(2)                 | 176.0(2)                               | 177.2(2)                               | 175.8(2)            | 0.68%                       | 0.97%                      |

Symmetry codes: a) 0.5-x, y-0.5, 0.5-z; b) x, 2-y, z-0.5; c) x-0.5, 1.5-y, z-0.5; d) 0.5-x, 0.5+y, 0.5-z; e) x, 2-y, z+0.5.
